# Supplementary material for: Multi-functionalized MOFs with large-pore apertures as luminescent probes for efficient sensing of quinones
Source: Royal Society of Chemistry journal article supplement (doi:10.1039/d2nj05689e), 2023-01-01
Supplement: d2nj05689e1.pdf [file d2nj05689e1.pdf]

# Multi-functionalized MOFs with Large-Pore Apertures as Luminescent Probes for Efficient Sensing of Quinones

Jia-Qian Chen <sup>a‡</sup>, Leili Esrafilii <sup>b‡</sup>, Fatemeh Parsa <sup>b‡</sup>, An-Na Sun <sup>\*a</sup>, Mao-Lin Hu <sup>\*a</sup>, Ali Morsali <sup>\*b</sup>,

Pascal Retailleau <sup>c</sup>, Zhifang Guo, <sup>d</sup> Peter C. Junk <sup>d</sup>

<sup>a</sup>College of Chemistry and Materials Engineering, Wenzhou University, Wenzhou 325035, P. R.

China, E-mail: 00111047@wzu.edu.cn; 00111024@wzu.edu.cn

<sup>b</sup>Department of Chemistry, Faculty of Sciences, Tarbiat Modares University, P.O. Box 14115-175,

Tehran, Iran. E-mail: Morsali\_a@modares.ac.ir; Telephone: 0098-21-82884416, Cell Phone: 0098-

9122420568

<sup>c</sup>Service de Cristallographie, Université Paris-Saclay, Institut de Chimie des Substances Naturelles-

.CNRS, Bât 27, 1 Avenue de la Terrasse, 91190 Gif sur Yvette, France

<sup>d</sup>College of Science & Engineering, James Cook University, Townsville, Qld, 4811, Australia

‡ These authors contributed equally to this work. \* Corresponding authors: E-mail addresses:

00111047@wzu.edu.cn (A.-N. Sun), 00111024@wzu.edu.cn (M.-L. Hu), morsali\_a@modares.ac.ir

(A. Morsali).

## 1. Experimental Section

### 1.1 Materials and Methods

All reagents for the syntheses and analysis were commercially available and used as received.

The infrared spectra were recorded on a Nicolet Fourier Transform IR, Nicolet 100 spectrometer in the range 500-4000 cm<sup>-1</sup> using the KBr disk technique. Crystallographic measurement for TMU-84 was undertaken on the MX1 beamline at the Australian Synchrotron, part of ANSTO,[1] and TMU-85 at 175(1) K for TMU-85 using Rigaku XtaLabPro mm003 Pilatus 200, delivering, MoK<sub>α</sub> (λ = 0.71073 Å) radiation. Melting points were measured on an Electrothermal 9100 apparatus. X-ray powder diffraction (XRD) measurements were performed using a Philips X'pert diffractometer with mono chromated Co-K<sub>α</sub> (1.78897 Å)

radiation. Elemental analyses were collected on a CHNS Thermo Scientific Flash 2000 elemental analyzer. The molecular structure scheme and simulated XRD powder pattern based on single crystal data were prepared using Mercury software. Details relating to the crystals and the structural refinements are presented in Table S1. Full details of crystals data and structure refinements, in CIF format, are available as Supplementary Information CCDC 1864216 and 2084352 for TMU-84 and TMU-85 respectively.

### *1.2 Synthesis of azine and azobenzene based ligands*

The azobenzene-4,4-dicarboxylic acid was synthesized according to the reported procedure. In summary, 12 mmol of 4-nitrobenzoic acid (2.0 g) and 144 mmol NaOH (5.75 g) were dissolved in 30 mL of distilled water. By adding 20 mL of glucose (13.0 g, 72 mmol) aqueous solution (70 °C), a yellow precipitate formed which was vigorously stirred and upon further addition of glucose a brown solution resulted. The mixture was refluxed overnight under a stream of air. The light brown precipitate was dissolved in water, and the pH adjustment in range of 5-6 was done by acetic acid. The light pink precipitate was filtered and washed several times by water and dried in vacuum to give azobenzene-4,4-dicarboxylic acid (Scheme S1). Yield: 65%. <sup>1</sup>H NMR (500 MHz, DMSO-d<sub>6</sub>) δ (ppm): 8.3 (d, 4H, J = 8.4 Hz), 8.15 (d, 4H, J = 8.4 Hz). Synthesis of 2,5-bis(4-pyridyl)-3,4-diaza-2,4-hexadiene (4-bpdh) linker also was done based on literature methods.

**X-ray crystallography:** TMU-84 was measured at the Australian Synchrotron on the MX1 macromolecular beamline, data integration was completed using XDS[2] software programs. Structural solutions were obtained by charge flipping[3] methods and refined using full-matrix least-squares methods against F<sub>2</sub> using SHELX2015, [3] in conjunction with Olex2 [3] graphical user interface. All hydrogen atoms were placed in calculated positions using the riding model.

**Table S.1.** Crystals data and structure refinements of TMU-84 and TMU-85.

| Identification code               | TMU-84                                                                                                     | TMU-85                                                           |
|-----------------------------------|------------------------------------------------------------------------------------------------------------|------------------------------------------------------------------|
| Chemical formula                  | C <sub>28</sub> H <sub>22</sub> Cd N <sub>6</sub> O <sub>4</sub> ,1.5(C <sub>3</sub> H <sub>7</sub> N O),O | C <sub>21</sub> H <sub>15</sub> N <sub>4</sub> O <sub>4</sub> Zn |
| computing_structure_refinement    | SHELXL-2018/3                                                                                              | SHELXL-2018/3                                                    |
| Chemical formula weight           | 700.01                                                                                                     | 775.29                                                           |
| T(K)                              | 100.2                                                                                                      | 293.2                                                            |
| Crystal syst                      | Monoclinic                                                                                                 | Triclinic                                                        |
| Space group                       | P 2/n                                                                                                      | P <sub>-1</sub>                                                  |
| a (°Å)                            | 9.6230(19)                                                                                                 | 17.0853(7)                                                       |
| b (°Å)                            | 12.319(3)                                                                                                  | 17.0996(6)                                                       |
| c (°Å)                            | 30.374(6)                                                                                                  | 18.1213(7)                                                       |
| α (deg)                           | 90                                                                                                         | 93.078(3)                                                        |
| β (deg)                           | 91.18(3)                                                                                                   | 102.821(3)                                                       |
| γ (deg)                           | 90                                                                                                         | 105.231(3)                                                       |
| V (Å <sup>3</sup> )               | 3599.94                                                                                                    | 4945.4                                                           |
| Z                                 | 4                                                                                                          | 4                                                                |
| F(000)                            | 1648                                                                                                       | 1597                                                             |
| R(int)                            | 0.1064                                                                                                     | 0.0830                                                           |
| Goodness-of-fit on F <sup>2</sup> | 1.369                                                                                                      | 1.086                                                            |
| wR factor                         | 0.2667                                                                                                     | 0.2337                                                           |
| CCDC number                       | 1864216                                                                                                    | 2084352                                                          |

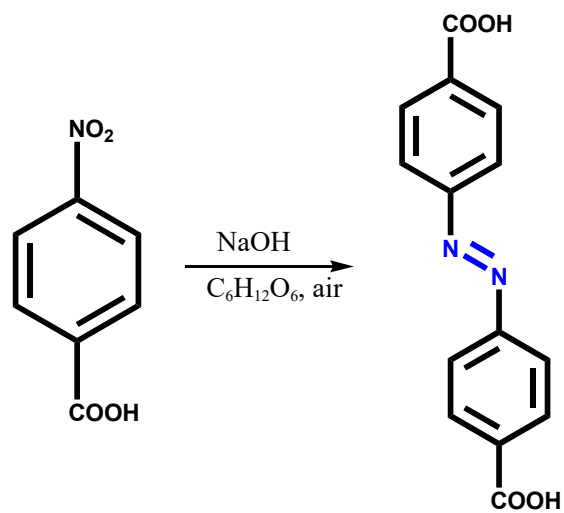

Scheme 1. Schematic representation of the production of  $\text{adcH}_2$  ligand.

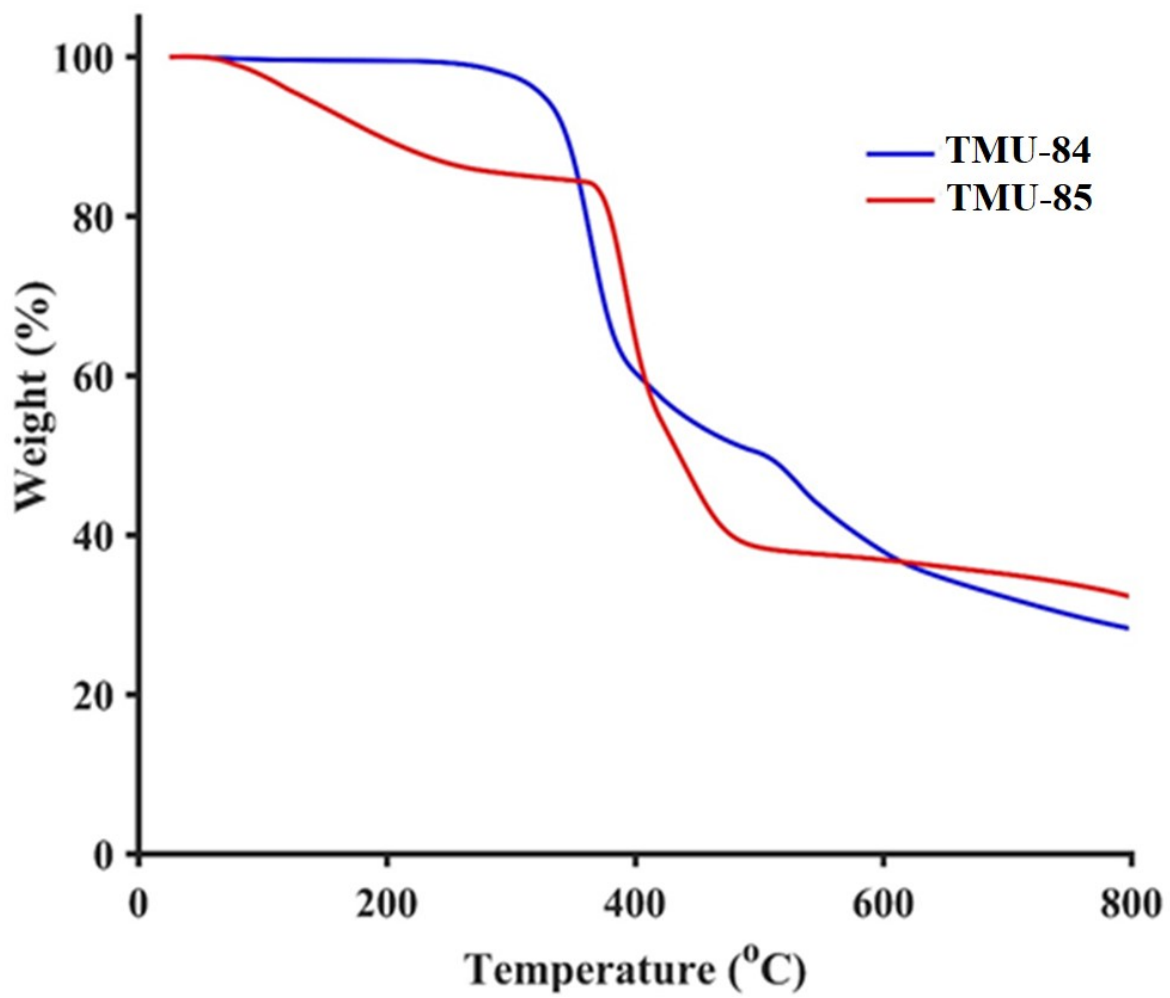

Figure S1. Thermogravimetric analysis of TMU-84 and TMU-85.

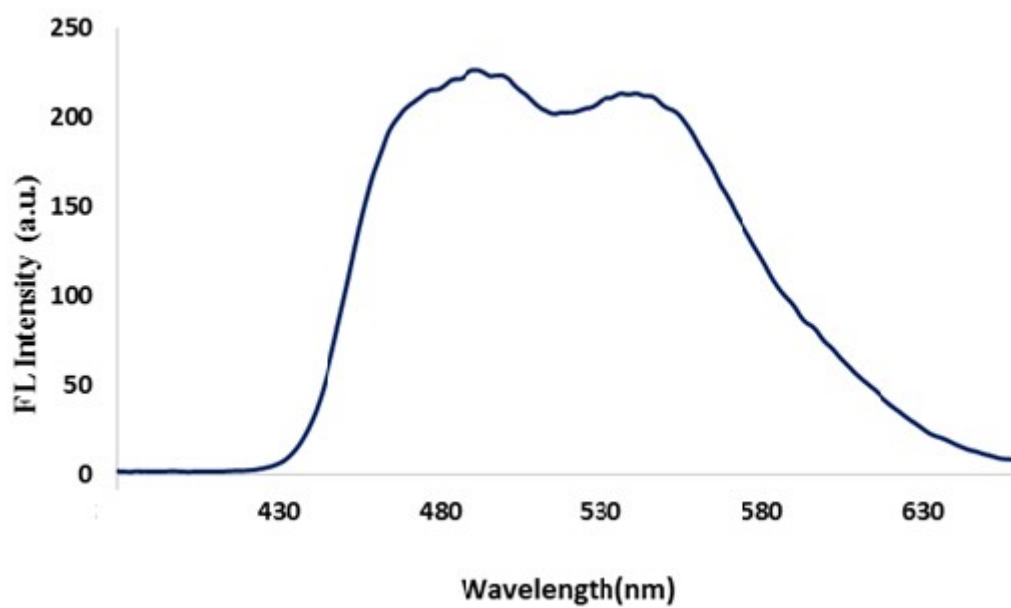

Figure S2: Fluorescence emission spectra of hydroxyanthraquinone

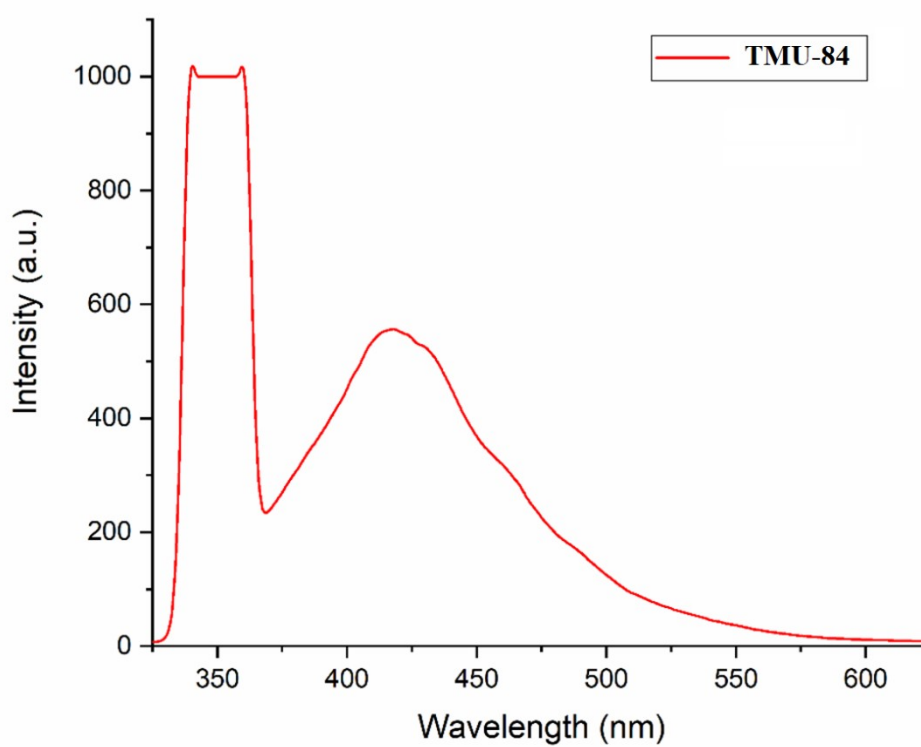

Figure S3: Fluorescence excitation and emission spectra of TMU-84

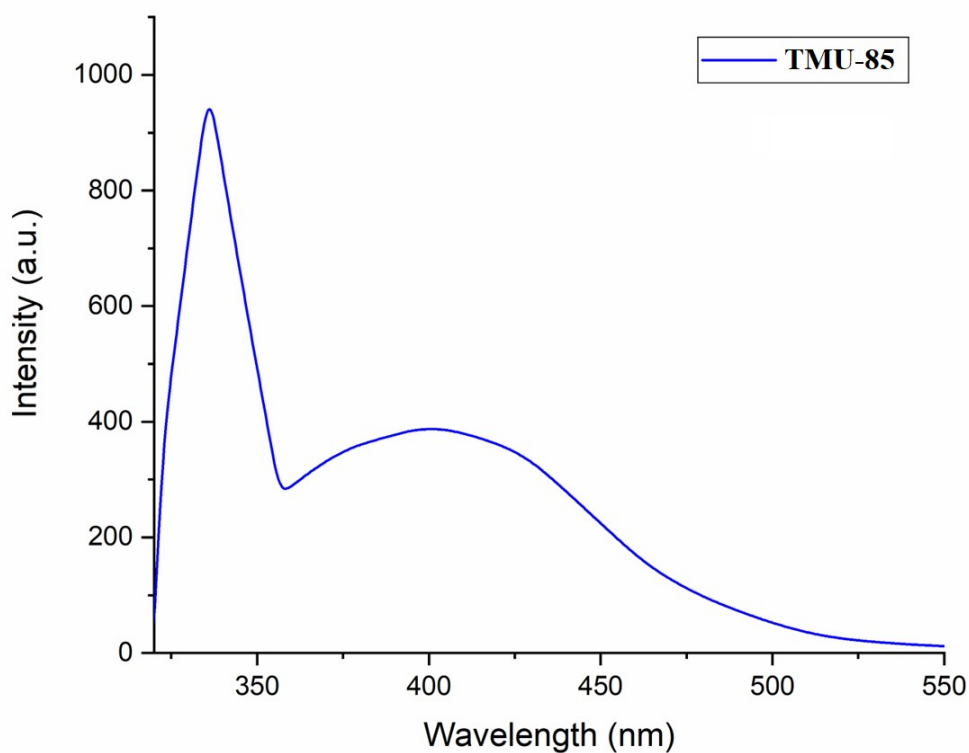

Figure S4: Fluorescence excitation and emission spectra of TMU-84

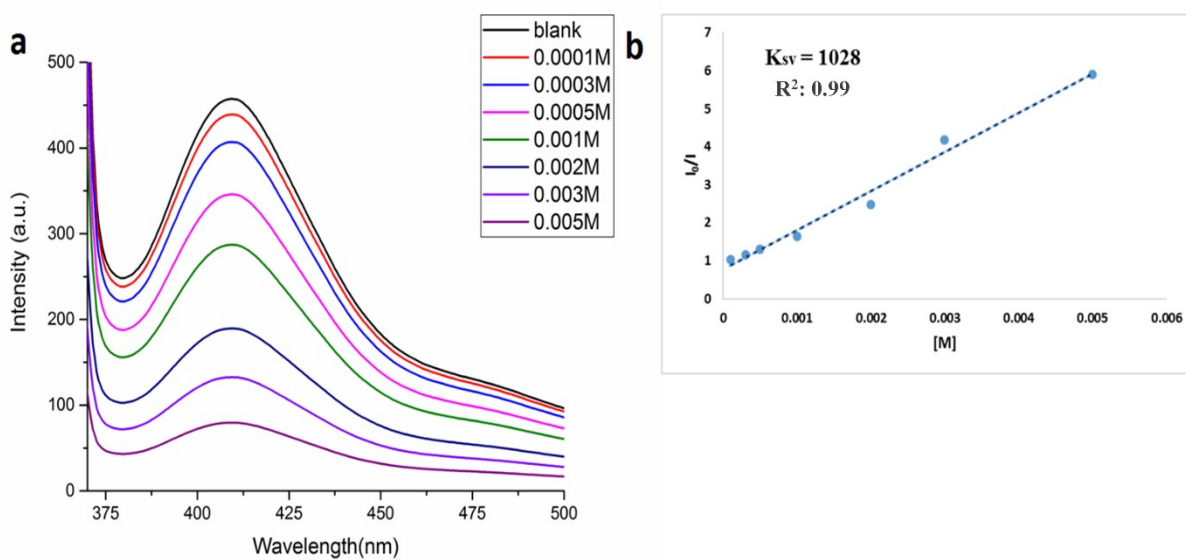

Figure S5: Fluorescence emission spectra of TMU-84 dispersed in EtOH solution of Naphthoquinone at different concentrations, (a). Stern–Volmer (SV) plots in the presence of 3 mg of TMU-84 in different Naphthoquinone (b)

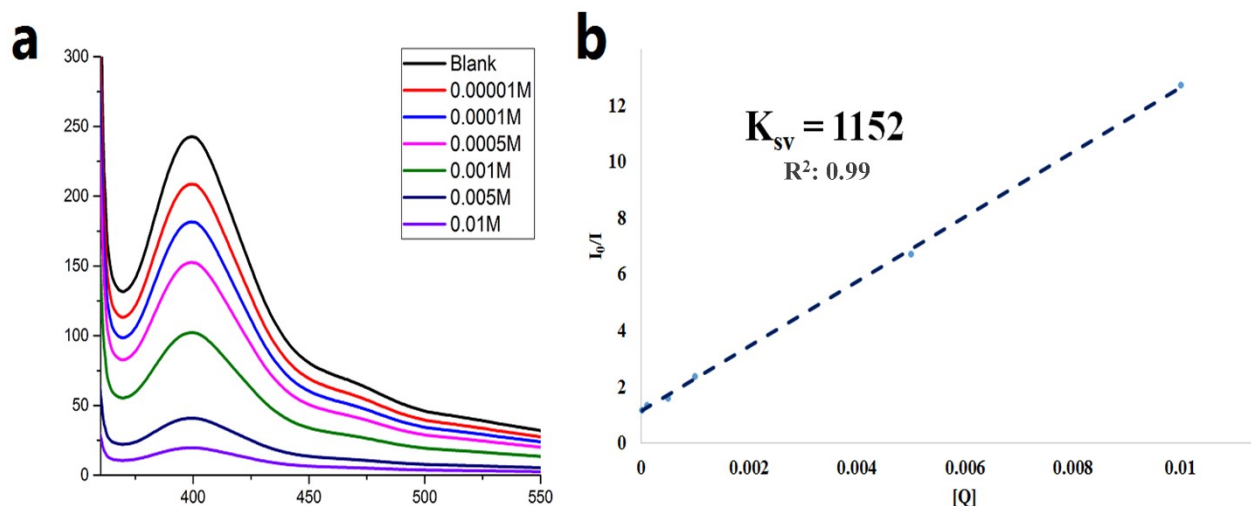

Figure S6: Fluorescence emission spectra of TMU-85 dispersed in EtOH solution of Naphthoquinone at different concentrations, (a). Stern–Volmer (SV) plots in the presence of 3 mg of TMU-85 in different Naphthoquinone (b)

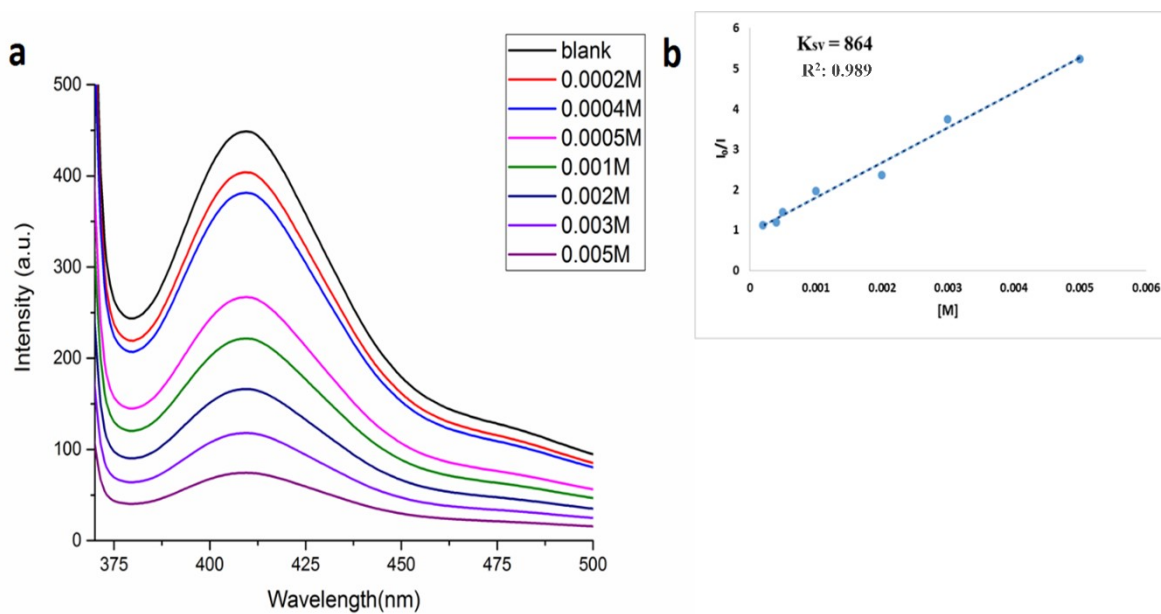

Figure S7: Fluorescence emission spectra of TMU-84 dispersed in EtOH solution of anthraquinone at different concentrations, 3(a). Stern–Volmer (SV) plots in the presence of 3 mg of TMU-84 in different anthraquinone (b)



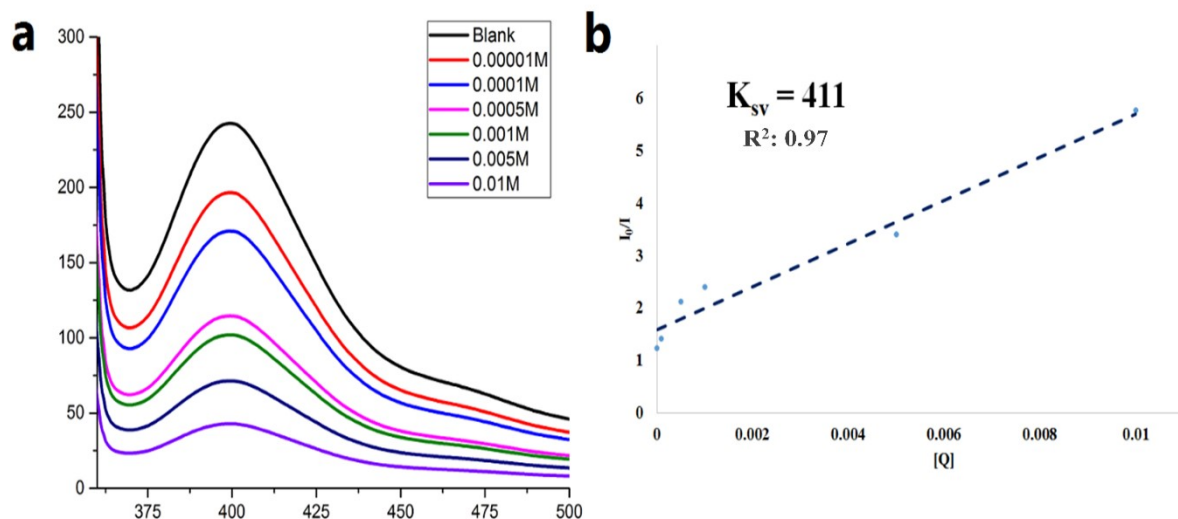

Figure S8: Fluorescence emission spectra of TMU-85 dispersed in EtOH solution of anthraquinone at different concentrations, (a). Stern–Volmer (SV) plots in the presence of 3 mg of TMU-85 in different anthraquinone (b)

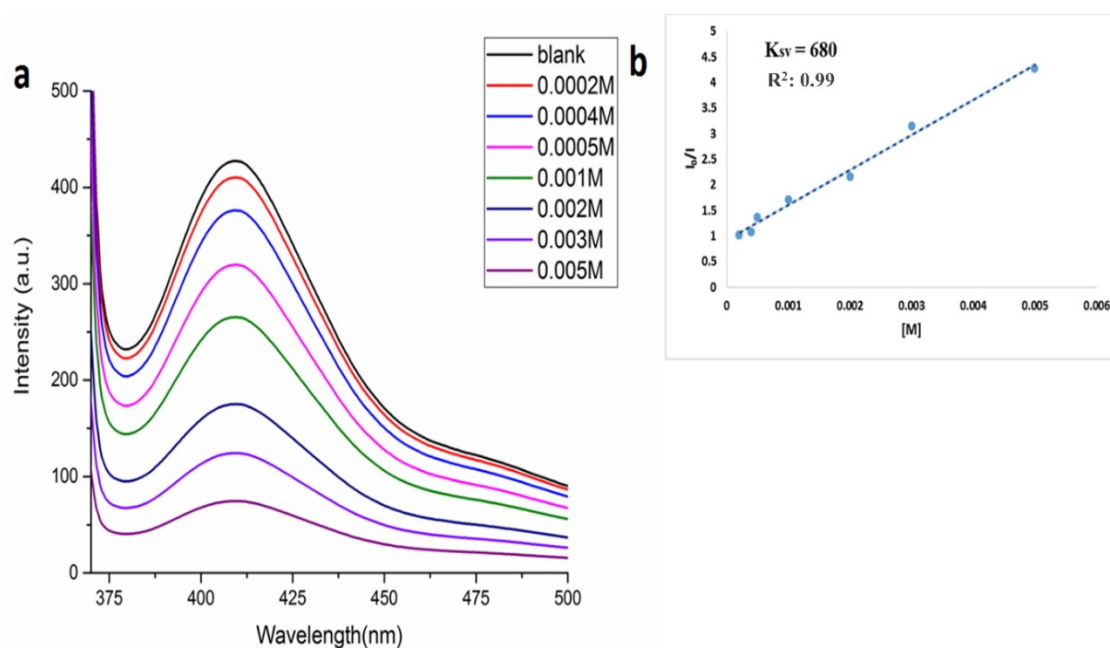

Figure S9: Fluorescence emission spectra of TMU-84 dispersed in EtOH solution of anthraquinone at different concentrations, (a). Stern–Volmer (SV) plots in the presence of 3 mg of TMU-84 in different 1,4-Benzoquinone (b)

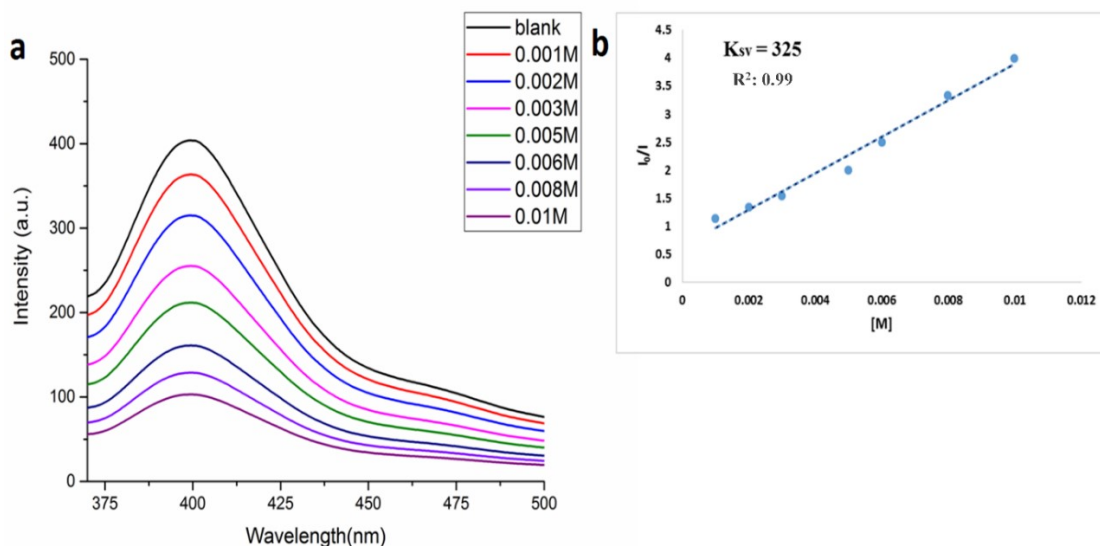

Figure

S10: Fluorescence emission spectra of TMU-85 dispersed in EtOH solution of anthraquinone at different concentrations, (a). Stern–Volmer (SV) plots in the presence of 3 mg of TMU-85 in different 1,4-Benzoquinone (b)

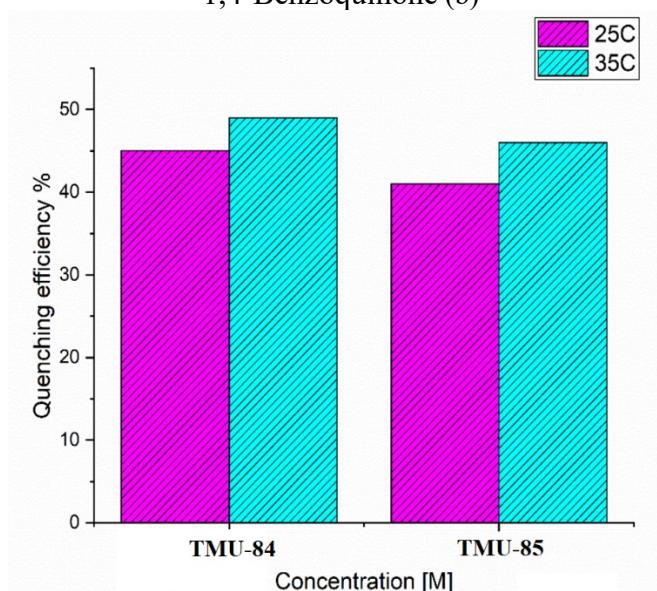

Figure S11: The quenching efficiency at temperatures 25 °C and 35 °C for Danthron detection in 0.0005M

## References

1. N.P. Cowieson, D. Aragao, M. Clift, D.J. Ericsson, C. Gee, S.J. Harrop, N. Mudie, S. Panjekar, J.R. Price, A. Riboldi-Tunnicliffe, MX1: a bending-magnet crystallography beamline serving both chemical and macromolecular crystallography communities at the Australian Synchrotron, *Journal of synchrotron radiation*, 22 (2015) 187-190.
2. W. Kabsch, Automatic processing of rotation diffraction data from crystals of initially unknown symmetry and cell constants, *Journal of applied crystallography*, 26 (1993) 795-800.
3. O.V. Dolomanov, L.J. Bourhis, R.J. Gildea, J.A. Howard, H. Puschmann, OLEX2: a complete structure solution, refinement and analysis program, *Journal of applied crystallography*, 42 (2009) 339-341.
4. R3 G. M. Sheldrick, *Acta Cryst.* 2015, C71, 3-8.
